# Supplementary material
Source: PubMed Central journal article supplement (PMC4629993)
Supplement: 10-1055-s-0035-1558079-sup_gf962.pdf [file 10-1055-s-0035-1558079-sup_gf962.pdf]

# Stellungnahme der Organkommission Ovar der AGO: die neuen FIGO- und WHO-Klassifikationen des Ovarial-, Tuben- und primären Peritonealkarzinoms

Statement by the Kommission Ovar of the AGO: The New FIGO and WHO Classifications of Ovarian, Fallopian Tube and Primary Peritoneal Cancer

**Autoren** I. Meinhold-Heerlein<sup>1</sup>, C. Fotopoulou<sup>2</sup>, P. Harter<sup>3</sup>, C. Kurzeder<sup>3</sup>, A. Mustea<sup>4</sup>, P. Wimberger<sup>5</sup>, S. Hauptmann<sup>6</sup>, J. Sehouli<sup>2</sup>, für die Organkommission Ovar der AGO

**Institute** Die Institutsangaben sind am Ende des Beitrags gelistet.

## Schlüsselwörter

- Borderline-Tumoren (LMP)
- FIGO-Stadium
- Ovarialkarzinom-Subtypen

## Key words

- borderline tumor
- FIGO stage
- ovarian cancer subtypes

## Zusammenfassung

Nach über 25 Jahren hat das FIGO Oncology Committee 2012 in Rom eine Überarbeitung der FIGO-Klassifikation zur Stadieneinteilung des Ovarialkarzinoms vorgenommen. Mit der Publikation Anfang 2014 ist die neue Klassifikation gültig. Den Erkenntnissen über die Pathogenese sowie der klinischen Praxis folgend werden das Ovarial-, das Tuben und das primäre Peritonealkarzinom einheitlich klassifiziert. Der histologische Subtyp wird angegeben (high grade serös – HGSC, low grade serös – LGSC, muzinös – MC; klarzellig – CCC und endometrioid – EC). Wesentliche Änderungen beziehen sich auf die Stadien III und IV: Stadium IIIA definiert nun einen auf das Becken beschränkten Tumor mit (ausschließlich) retroperitonealen Lymphknotenmetastasen (früher IIIC). Stadium IV wird in IVA und IVB aufgeteilt: IVA definiert einen malignen Pleuraerguss, IVB parenchymatöse oder extraabdominale Metastasen, zu denen auch die inguinalen und mediastinalen Lymphknoten und die Nabelmetastasen zählen. Nahezu zeitgleich wurde auch eine neue WHO-Klassifikation publiziert. Bei den serösen Tumoren wurde auf die tubare Karzinogenese des serösen Ovarialkarzinoms eingegangen, wenn auch in bis zu 30% der serösen High-Grade-Karzinome keine tubare Vorläuferläsion gefunden werden. Die Zahl der Subgruppen wurde auf High-grade seröse, Low-grade seröse, muzinöse, seromuzinöse, endometrioid, klarzellige Karzinome und Brenner-Tumoren reduziert. Das Transitionalzellkarzinom ist weggefallen, die seromuzinösen Tumoren sind neu. Der Rolle der Borderline-Tumoren als Progressionsstufe zwischen benignen und invasiven Läsionen wird mehr Raum gegeben.

## Abstract

More than 25 years after the last revision, in 2012 the FIGO Oncology Committee began revising the FIGO classification for staging ovarian, Fallopian tube and primary peritoneal cancers. The new classification has become effective with its publication at the beginning of 2014. Following recent findings on the pathogenesis of ovarian, Fallopian tube and primary peritoneal cancer and reflecting standard clinical practice, the three entities have now been classified uniformly. The histological subtype is included (high-grade serous – HGSC; low-grade serous – LGSC; mucinous – MC; clear cell – CCC; endometrioid – EC). Stages III and IV have been fundamentally changed: stage IIIA now refers to a localized tumor limited to the pelvis with (only) retroperitoneal lymph node metastasis (formerly classified as IIIC). Stage IV has been divided into IVA and IVB, with IVA defined as malignant pleural effusion and IVB as parenchymatous or extra-abdominal metastasis including inguinal and mediastinal lymph node metastasis as well as umbilical metastasis. A new WHO classification was published almost concurrently. The classification of serous tumors addresses the issue of the tubal carcinogenesis of serous ovarian cancer, even if no tubal precursor lesions are found for up to 30% of serous high-grade cancers. The number of subgroups was reduced and subgroups now include only high-grade serous, low-grade serous, mucinous, seromucinous, endometrioid, clear cell and Brenner tumors. The category “transitional cell carcinomas” has been dropped and the classification “seromucinous tumors” has been newly added. More attention has been focused on the role of borderline tumors as a stage in the progression from benign to invasive lesions.

**eingereicht** 5. 7. 2015  
**revidiert** 31. 7. 2015  
**akzeptiert** 3. 8. 2015

## Bibliografie

**DOI** <http://dx.doi.org/10.1055/s-0035-1558079>  
 Geburtsh Frauenheilk 2015; 75: 1–7 © Georg Thieme Verlag KG Stuttgart · New York · ISSN 0016-5751

## Korrespondenzadresse

**Prof. Dr. med.**  
**Ivo Meinhold-Heerlein**  
 Klinik für Gynäkologie  
 und Geburtsmedizin  
 Uniklinik RWTH Aachen  
 Pauwelsstraße 30  
 52074 Aachen  
 imeinhold@ukaachen.de

## Einleitung

Umfangreiche wissenschaftliche Untersuchungen haben über die letzten Jahre zu einem grundsätzlich neuen Verständnis der Tumorbio­logie des Ovarialkarzinoms geführt. Es ist inzwischen unstrittig, dass der Begriff „Ovarialkarzinom“ eine heterogene Gruppe maligner Tumoren subsumiert, die sich hinsichtlich ihrer Ätiologie, Pathogenese, Prognose, Pathologie und Molekularpathologie wesentlich unterscheiden [1]. Zudem haben zahlreiche klinische Studien die wichtigsten Prognosefaktoren identifiziert, deren klinische Relevanz auch in therapeutische Entscheidungen einfließt. Das FIGO Oncology Committee hat daher die bisherige FIGO-Klassifikation von 1988 in einem mehrjährigen Prozess überarbeitet und 2014 publiziert [2]. Mit dieser Publikation ist nur noch die neue Klassifikation gültig und sollte daher sowohl in der klinischen als auch wissenschaftlichen Praxis angewendet werden. Die aktuelle S3-Leitlinie (www.ago-online.org) bezieht sich auf die „ältere“ FIGO-Klassifikation (1988) [3–5], sodass wir mit dieser Stellungnahme bis zur offiziellen Aktualisierung der S3-Leitlinie eine Orientierung geben möchten. Im Folgenden werden die wesentlichen Aspekte der neuen „FIGO-Klassifikation des Ovarial-Tuben- und primären Peritonealkarzinoms“ vorgestellt. Um Unterschiede zu verdeutlichen, erfolgt auch eine Gegenüberstellung in Tabellenform.

Etwa 90% aller malignen Tumoren von Ovar, Tube und Peritoneum sind epitheliale Tumoren (Karzinome). Morphologische, genetische, epigenetische Untersuchungen sowie Expressionsanalysen haben zur Erkenntnis geführt, dass das Ovarialkarzinom eine heterogene Gruppe von Tumoren umfasst, die sich als Ovarial-, Tuben- oder Peritonealkarzinom präsentieren können. Am besten untersucht sind die serösen Karzinome, die etwa 80% aller Tumoren ausmachen. Für sie gilt kein kontinuierliches Grading mehr („G1, 2, 3“), sondern es werden nur noch die beiden grundsätzlich pathologisch, molekular und prognostisch verschiedenen Typen „low grade“ und „high grade“ unterschieden und sollten daher auch in den pathologischen Gutachten dementsprechend angegeben werden. Seröse Low-Grade-Karzinome sind gut differenziert und entwickeln sich aus benignen Zystadenomen über seröse Borderlinetumoren und deren mikropapilläre Variante. Seröse High-Grade-Karzinome sind geringgradig differenziert. Für sie sind keine ovariellen Vorläuferläsionen bekannt. Es gibt aber Hinweise darauf, dass eine große Anzahl der High-Grade-Karzinome in der Tube entsteht, zumal sich im Zusammenhang mit High-Grade-Karzinomen in makroskopisch unauffälligen Tuben „serous tubal intraepithelial carcinomas – sogenannte STICS“ nachweisen lassen [6, 7]. Für die Mehrheit der hereditären Karzinome ist die tubare Entstehung nachgewiesen [8, 9]. Low-Grade-Karzinome enthalten *KRAS*, *BRAF*, *PIK3CA*, *CTNNB1* and *PPP2R1A*-Mutationen, während High-Grade-Karzinome typischerweise *TP53*-Mutationen and *BRCA*-Mutationen oder -Inaktivierung enthalten (● **Tab. 1**) [10–12].

Wenn auch nach wie vor Inhalt wissenschaftlicher Untersuchungen und kontroverser Diskussion, so repräsentieren die 5 morphologischen Phänotypen am ehesten auch die 5 häufigsten Sub-

typen des epithelialen Ovarialkarzinoms: Low-grade serös (5%): LGSC, High-grade serös (70%): HGSC, muzinös (3%): MC, endometrioid (10%): EC, klarzellig (10%): CCC [13]. Daher schreibt die neue Klassifikation vor, dass zusätzlich zum Stadium der histologische Subtyp angegeben wird: HGSC, EC, CCC, MC, LGSC; „other“ oder „can not be classified“ [2].

Die oben skizzierten Erkenntnisse haben Eingang in das neue Staging-System der FIGO gefunden, das als Klassifikation für Ovarial-, Tuben- und primäres Peritonealkarzinom gilt. Entsprechend soll die Lokalisation des Primärtumors angegeben werden: OV für Ovar, FT für Tube und P für Peritoneum. Wenn die Primärlokalisation nicht angegeben werden kann, soll X angegeben werden [2]. Im Folgenden wird der Einfachheit halber für alle Typen der Begriff Ovarialkarzinom verwendet.

## Die neue FIGO-Klassifikation

Ziel jeglichen Stagings ist die Zuordnung von Tumoren und Patientinnen zu prognostisch einheitlichen Gruppen mittels Festlegung des Tumorstadiums sowie einer stadienangepassten Therapie. Auch die Vergleichbarkeit innerhalb wissenschaftlicher Untersuchungen hängt von der einheitlichen Klassifikation ab. Beim Ovarialkarzinom ist ein sorgfältiges klinisches, chirurgisches und pathologisches Staging für die korrekte Klassifikation notwendig. Die Operation umfasst eine Längslaparotomie, die Entnahme von Peritonealzytologie und von Biopsien aus suspekten und unauffälligen Arealen des Peritoneums, die Hysterektomie, bilaterale Salpingo-Oophorektomie, (infragastrische) Omentektomie sowie eine systematische pelvine und paraaortale Lymphonodektomie bei makroskopischer Tumorfreiheit oder die Entfernung der vergrößerten Lymphknoten („bulky nodes“), wenn keine makroskopische Tumorfreiheit erzielt werden kann (S3-Leitlinie Ovarialkarzinom, www.ago-online.org). Bei fortgeschrittenen Karzinomen sollten alle sichtbaren Tumormanifestationen entfernt werden, da der postoperative Tumorrest den entscheidenden Prognosefaktor darstellt. Gelingt die Entfernung aller makroskopisch sichtbaren Tumormanifestationen, ist ein optimales Debulking erreicht [14]. Bei der anschließenden histopathologischen Untersuchung soll außer der bereits erwähnten Primärlokalisation und dem histologischen Subtyp auch das Tumorgrading angegeben werden. Insbesondere beim serösen Karzinom ist die Unterscheidung in Low Grade und High Grade wesentlich. Dies könnte künftig therapeutische Bedeutung erlangen, da das Low-Grade-Karzinom eine günstigere Prognose besitzt und es Hinweise darauf gibt, dass diese Tumoren im Vergleich zu High-Grade-Karzinomen kaum auf eine Chemotherapie ansprechen [15, 16]. Für die muzinösen Tumoren existiert kein prognostisch relevantes Gradingssystem [17].

● **Tab. 2** zeigt das neue FIGO-Stagingsystem in Gegenüberstellung zur alten Version von 1988 und ● **Tab. 3** die korrespondierenden TNM-Stadien. Eine Aktualisierung der TNM-Klassifikation wird für 2016 erwartet [18].

**Tab. 1** Subtypen des Ovarialkarzinoms und assoziierte genetische Veränderungen [12].

| histologischer Subtyp | High-grade serös | Low-grade serös          | endometrioid                          | klarzellig                      | muzinös |
|-----------------------|------------------|--------------------------|---------------------------------------|---------------------------------|---------|
| <b>Mutationen</b>     | p53, BRCA 1/2    | KRAS/BRAF, Erbb2, PIK3CA | ARID1A, CTNNB1, PTEN, PIK3CA, PPP2RIA | ARID1A, PIK3CA, ZNF217, PPP2RIA | KRAS    |

**Tab. 2** FIGO-Staging von Ovarial-, Tuben und primärem Peritonealkarzinom (FIGO 2013 vs. FIGO 1988) – Unterschiede **fett** gedruckt.

| FIGO (1988)                                                                                                                                                                 | FIGO (2013)                                                                                                                                                                                                                                                                                                                                                                                                                                       |
|-----------------------------------------------------------------------------------------------------------------------------------------------------------------------------|---------------------------------------------------------------------------------------------------------------------------------------------------------------------------------------------------------------------------------------------------------------------------------------------------------------------------------------------------------------------------------------------------------------------------------------------------|
| I: Tumor auf die Ovarien beschränkt                                                                                                                                         | I: Tumor auf die Ovarien <b>oder Tube(n)*</b> beschränkt                                                                                                                                                                                                                                                                                                                                                                                          |
| IA: Tumor auf 1 Ovar beschränkt (Kapsel intakt), kein Tumor an Ovaroberfläche, keine malignen Zellen in Aszites oder Peritonealzytologie                                    | IA: Tumor auf 1 Ovar beschränkt <b>oder Tube</b> (Kapsel intakt), kein Tumor an Ovaroberfläche, keine malignen Zellen in Aszites oder Peritonealzytologie                                                                                                                                                                                                                                                                                         |
| IB: Tumor auf beide Ovarien beschränkt (Kapsel intakt), kein Tumor an Ovaroberfläche, keine malignen Zellen in Aszites oder Peritonealzytologie                             | IB: Tumor auf beide Ovarien <b>oder Tuben</b> beschränkt (Kapsel intakt), kein Tumor an Ovar- <b>oder Tuben</b> oberfläche, keine malignen Zellen in Aszites oder Peritonealzytologie                                                                                                                                                                                                                                                             |
| IC: Tumor auf 1 oder beide Ovarien beschränkt mit einem der folgenden Kriterien: Kapselruptur, Tumor auf Ovaroberfläche, maligne Zellen in Aszites oder Peritonealzytologie | IC: Tumor auf 1 oder beide Ovarien <b>oder Tube(n)</b> beschränkt mit einem der folgenden Kriterien:<br><ul style="list-style-type: none"> <li>▶ <b>IC1: intraoperative Kapselruptur</b></li> <li>▶ <b>IC2: präoperative Kapselruptur oder Tumor auf Ovar- oder Tubenoberfläche</b></li> <li>▶ <b>IC3: maligne Zellen in Aszites oder Peritonealzytologie</b></li> </ul>                                                                          |
| II: Tumor in 1 oder beiden Ovarien mit Ausbreitung im Becken                                                                                                                | II: Tumor in 1 oder beiden Ovarien <b>oder Tube(n)</b> mit Ausbreitung im Becken oder <b>primäres Peritonealkarzinom**</b>                                                                                                                                                                                                                                                                                                                        |
| IIA: Ausbreitung und/oder Implantationen auf Uterus und/oder Tube(n); keine malignen Zellen in Aszites oder Peritonealzytologie                                             | IIA: Ausbreitung und/oder Implantationen auf Uterus und/oder Tube(n) <b>und/oder Ovar(ien)</b>                                                                                                                                                                                                                                                                                                                                                    |
| IIB: Ausbreitung innerhalb des Beckens; keine malignen Zellen in Aszites oder Peritonealzytologie                                                                           | IIB: intraperitoneale Ausbreitung innerhalb des Beckens                                                                                                                                                                                                                                                                                                                                                                                           |
| IIC: IIA oder IIB mit malignen Zellen in Aszites oder Peritonealzytologie                                                                                                   |                                                                                                                                                                                                                                                                                                                                                                                                                                                   |
| III: Tumor in 1 oder beiden Ovarien mit mikroskopisch nachgewiesenen peritonealen Metastasen außerhalb des Beckens und/oder regionale Lymphknotenmetastasen                 | III: Tumor in 1 oder beiden Ovarien <b>oder Tube(n) oder primäres Peritonealkarzinom</b> mit zytologisch oder histologisch nachgewiesener peritonealer Metastasierung außerhalb des Beckens und/oder <b>retroperitoneale</b> Lymphknotenmetastasen.                                                                                                                                                                                               |
| IIIA: mikroskopisch nachgewiesene peritoneale Metastasen außerhalb des Beckens                                                                                              | <b>IIIA1: Nur positive retroperitoneale Lymphknoten (zytologisch oder histologisch nachgewiesen)</b><br><ul style="list-style-type: none"> <li>▶ <b>IIIA1(i): Metastasen bis 10 mm in größter Ausdehnung</b></li> <li>▶ <b>IIIA1(ii): Metastasen größer als 10 mm in größter Ausdehnung</b></li> </ul> <b>IIIA2: mikroskopisch nachgewiesene peritoneale Metastasen außerhalb des Beckens mit oder ohne positive retroperitoneale Lymphknoten</b> |
| IIIB: makroskopische peritoneale Metastasen außerhalb des Beckens von bis zu 2 cm                                                                                           | IIIB: Makroskopische peritoneale Metastasen außerhalb des Beckens von bis zu 2 cm, <b>mit oder ohne retroperitoneale Lymphknotenmetastasen (einschließlich Leberkapsel und Milzkapsel, aber ohne parenchymatöse Metastasen)</b>                                                                                                                                                                                                                   |
| IIIC: makroskopische peritoneale Metastasen außerhalb des Beckens größer als 2 cm und/oder regionale Lymphknotenmetastasen                                                  | IIIC: makroskopische peritoneale Metastasen außerhalb des Beckens größer als 2 cm mit oder ohne retroperitoneale Lymphknotenmetastasen (einschließlich Leberkapsel und Milzkapsel, aber ohne parenchymatöse Metastasen)                                                                                                                                                                                                                           |
| IV: distante Metastasen außer peritonealen Metastasen                                                                                                                       | IV: distante Metastasen außer peritonealen Metastasen<br><b>IVA: Pleuraerguss mit positiver Zytologie</b><br><b>IVB: parenchymatöse Metastasen und Metastasen in extraabdominalen Organen (einschließlich inguinalen Lymphknoten und Lymphknoten außerhalb der Abdominalhöhle)***</b>                                                                                                                                                             |

\* Es gibt kein primäres Peritonealkarzinom im Stadium I.

\*\* Dichte Adhäsionen mit histologisch nachgewiesenen Tumorabsiedelungen führen zum Upstaging von Stadium I nach II.

\*\*\* Extraabdominale Metastasen schließen transmurale Darminfiltration und Nabelmetastasen ein.

**Tab. 3** FIGO-Stadium und TNM-Stadium.

| FIGO-Stadium | T     | N     | M                                                   |
|--------------|-------|-------|-----------------------------------------------------|
| IA           | T1a   | N0    | M0                                                  |
| IB           | T1b   | N0    | M0                                                  |
| IC           | T1c   | N0    | M0                                                  |
| IIA          | T2a   | N0    | M0                                                  |
| IIB          | T2b   | N0    | M0                                                  |
| IIIA         | T3a   | N0    | M0                                                  |
|              | T3a   | N1    | M0                                                  |
| IIIB         | T3b   | N0    | M0                                                  |
|              | T3b   | N1    | M0                                                  |
| IIIC         | T3c   | N0    | M0                                                  |
|              | T3c   | N1    | M0                                                  |
| IVA          | Any T | Any N | M1 (maligner Pleuraerguss)                          |
| IVB          | Any T | Any N | M1 (parenchymatöse und extraabdominale Metastasen)* |

\* Extraabdominale Metastasen schließen transmurale Darminfiltration, Nabelmetastasen sowie inguinale Lymphknotenmetastasen und Lymphknotenmetastasen außerhalb der Abdominalhöhle ein.

### Das Stadium I

Stadium I umfasst Tumoren, die auf Ovarien, Tuben begrenzt sind und bei denen Tumorzellen in der Peritonealflüssigkeit vorhanden sein können. Ein wesentlicher Unterschied zwischen alter und neuer Klassifikation ist die explizite Nennung der Tube als möglichem Ausgangspunkt und die Unterteilung des Stadium IC in Zeitpunkt und Ursache der Kapselruptur: intraoperativ (IC1), präoperativ (IC2) oder atypische Zellen in Aszites oder Spülzytologie (IC3). Eine intraoperative Ruptur sollte unbedingt vermieden werden, wobei aber eine definitive Aussage zur Prognoseverschlechterung nicht abschließend gegeben werden kann. Diese Fragestellung muss in weiteren Studien wissenschaftlich aufgearbeitet werden. Mit der neuen Klassifikation ist aber die iatrogene Ruptur eines eigentlichen FIGO-Stadiums IA klar als FIGO-Stadium IC1 klassifiziert und soll auch dementsprechend behandelt werden [19]. Wenn bei einem vermeintlichen Stadium I Tumorzellen in Adhäsionen nachgewiesen werden, erfolgt ein „Up-Staging“ nach Stadium II [2]. Die IC1–IC3-Klassifikation hat bisher aber noch keine therapeutische Relevanz. Die konsequente Unterteilung des Stadiums I ist aber Grundvoraussetzung, um weitere risikoadaptierte Therapiestrategien entwickeln zu können.

### Stadium II

Das Stadium II umfasst die kleine Gruppe der Tumoren, deren Ausbreitung auf das Becken beschränkt bleibt unterhalb der Linie zwischen den beiden Spinae iliacae anteriores superiores („below pelvic brim“). Auch eine Sigma-Metastase oder die Infiltration des Sigma innerhalb des Beckens sind im Stadium II subsumiert. Jegliche maligne Peritonealabsiedelung im kleinen Becken führt zum Stadium II. Somit gibt es kein Peritonealkarzinom im Stadium I. Das frühere Stadium IIc existiert nicht mehr [2].

### Stadium III

Das Stadium III umfasst die größte Gruppe der fortgeschrittenen Karzinome mit Tumormanifestationen außerhalb des Beckens im gesamten Bereich des Peritoneums, des Omentums, der Gerotafaszie, der Leberkapsel, der Milzkapsel (jeweils ohne parenchymatöse Metastasen) und/oder Lymphknotenmetastasen. Isolierte (paraaortale) Lymphknotenmetastasen bei gleichzeitiger Beschränkung der Tumorausbreitung auf das Becken bergen eine bessere Prognose als intraperitoneale Tumormanifestationen außerhalb des Beckens. Daher wurde das Stadium III neu unterteilt: Stadium IIIA1 umfasst Tumoren im Becken mit retroperitonealen Lymphknotenmetastasen bis 1 cm (IIIA1i) oder größer als 1 cm (IIIA1ii). Stadium IIIA2 umfasst mikroskopische Tumormanifestationen außerhalb des Beckens unabhängig von Lymphknotenmetastasen. Stadium IIIB umfasst Tumoren < 2 cm außerhalb des Beckens mit oder ohne retroperitonealen Lymphknotenmetastasen. In der alten Klassifikation wurden alle Tumoren mit retroperitonealen Lymphknotenmetastasen als Stadium IIIC klassifiziert, sodass bisherige Stadien IIIC nun auch Stadium IIIA („nur positive Lymphknoten“) oder IIIB (Tumoren < 2 cm) entsprechen können. Bei der Indikation zur Therapie mit Bevacizumab (zugelassen für Stadien IIIB–IV der alten FIGO-Klassifikation entsprechend Stadien IIIA–IV der neuen FIGO-Klassifikation) muss dies beachtet werden. Gegebenenfalls muss der Krankenkasse erläutert werden, dass ein derzeitiges Stadium IIIA ursprünglich Stadium IIIC war und die Zulassung auf der alten Klassifikation beruht. Die alleinige Palpation vergrößerter Lymphknoten erlaubt keine Einstufung als „Metastase“; Lymphknotenmetastasen müssen zytologisch oder histologisch gesichert werden [2].

### Stadium IV

Das Stadium IV umfasst alle Tumoren mit Fernmetastasen – mit Ausnahme der peritonealen Metastasen, die zu den Stadien II und III gehören. Das Stadium IV wird in die Stadien IVA und IVB unterteilt. Bei Stadium IVA liegt nur ein maligner Pleuraerguss vor. Bei Stadium IVB liegen parenchymatöse Metastasen oder extraabdominale Metastasen vor (einschließlich Lymphknoten außerhalb des Abdomens, Tumor in Nabel oder Bauchdecke, Mukosabefall bei Darminfiltration). Auch inguinale Lymphknoten werden demnach nicht mehr unter Stadium IIIC, sondern künftig unter Stadium IVB eingeordnet, wobei die Sinnhaftigkeit dieses Vorgehens noch nicht abschließend wissenschaftlich geklärt ist. Es wird auch nach wie vor kontrovers diskutiert, ob resezierbare Tumoren am Nabel, im Bereich der Darmmukosa und in Leber sowie Milz künftig eher als Stadium IIIC bezeichnet werden sollen. Aktuell werden diese als FIGO IVB klassifiziert. Auch die Unterscheidung von FIGO IV in IVA und IVB wird kontrovers beurteilt [2].

Mit der neuen Klassifikation hat das FIGO Oncology Committee den bisherigen klinischen und translationalen Studien Rechnung getragen. Inzwischen wurden bereits erste Untersuchungen publiziert, welche die alte und neue Klassifikation bez. des krankheitsfreien und des Gesamtüberlebens vergleichen. Hier zeigte sich für die neue Klassifikation eine bessere Diskriminierung der prognostisch unterschiedlichen (Sub-)Stadien [20,21].

### Die neue WHO-Klassifikation

▼ Während es bei der FIGO-Klassifikation um die Einteilung von Tumorstadien geht, dient die WHO-Klassifikation der Festlegung, um welchen Tumortyp es sich histopathologisch und auch molekular handelt. Beides – das Stadium und die Art des Tumors – sind bereits heute wichtige Kriterien für die differenzierte Therapie.

Die folgenden Abschnitte geben einen Überblick über die Änderungen in der WHO-Klassifikation, die ebenfalls 2014 publiziert wurde und somit bereits gültig ist [22].

In der alten Klassifikation fokussiert das Kapitel „Ovarialkarzinom“ auf die mesotheliale Oberflächenbedeckung des Ovars als Ausgangspunkt der epithelialen Ovarialtumoren. Dies wurde in der neuen Klassifikation nun aufgegeben. Stattdessen wird bereits in der Einleitung zu den serösen Tumoren auf die tubare Karzinogenese eingegangen, wenn auch in bis zu 30% der serösen High-Grade-Karzinome keine tubare Vorläuferläsion gefunden werden kann; der ursprünglich vermutete Pathogeneseweg ist daher für einen Teil der serösen Karzinome sicher zutreffend. Weiterhin wird betont, dass bei fortgeschrittenen serösen Karzinomen häufig keine verlässliche Beurteilung des Ausgangspunkts möglich ist. Die neue Klassifikation (► Tab. 4) ist durch eine Reduktion der Subgruppen konsistenter geworden. Das Transitionalzellkarzinom ist weggefallen, die seromuzinösen Tumoren sind hinzugekommen. Der Rolle der Borderlinetumoren als Progressionsstufe zwischen benignen und invasiven Läsionen wird bei den verschiedenen histologischen Subtypen mehr Raum gegeben. Die folgenden Abschnitte fassen die wesentlichen Neuerungen bei den serösen, muzinösen, seromuzinösen endometrioiden, klarzelligen und Brenner-Tumoren zusammen [22].

### Seröse Tumoren

Die Grenzziehung zwischen den Adenomen und den Borderlinetumoren (SBOTs) ist in der neuen WHO-Klassifikation schärfer

Tab. 4 Bisherige und neue WHO-Klassifikation.

| bisher                                              | neu (2014)                                                                |
|-----------------------------------------------------|---------------------------------------------------------------------------|
| <b>seröse Tumoren</b>                               |                                                                           |
| <b>benigne</b>                                      |                                                                           |
| Zystadenom                                          | Zystadenom                                                                |
| papilläres Zystadenom                               | Adenofibrom                                                               |
| Oberflächenpapillom                                 | Oberflächenpapillom                                                       |
| Adenofibrom und Zystadenofibrom                     |                                                                           |
| <b>Borderline (SBOT)</b>                            |                                                                           |
| papillär-zystischer BOT                             | seröser BOT/atypisch proliferierender Tumor                               |
| papillärer Oberflächen-BOT                          | SBOT, mikropapilläre Variante/nicht invasives, seröses Low-Grade-Karzinom |
| adenofibromatöser und zystadenofibromatöser BOT     |                                                                           |
| <b>maligne</b>                                      |                                                                           |
| Adenokarzinom                                       | seröses Low-Grade-Karzinom                                                |
| papilläres Oberflächenkarzinom                      | seröses High-Grade-Karzinom                                               |
| Adenokarzinofibrom                                  |                                                                           |
| <b>muzinöse Tumoren</b>                             |                                                                           |
| <b>benigne</b>                                      |                                                                           |
| Zystadenom                                          | Zystadenom                                                                |
| Adenofibrom und Zystadenofibrom                     | Adenofibrom                                                               |
| muzinös-zystischer Tumor mit Mural Nodules          |                                                                           |
| muzinös-zystischer Tumor mit Pseudomyxoma peritonei |                                                                           |
| <b>Borderline (MBOT)</b>                            |                                                                           |
| intestinaler Typ                                    | muzinöser BOT/atypisch proliferierender muzinöser Tumor                   |
| endozervikaler Typ                                  |                                                                           |
| <b>maligne</b>                                      |                                                                           |
| Adenokarzinom                                       | muzinöses Karzinom                                                        |
| Adenokarzinofibrom (malignes Adenofibrom)           |                                                                           |
| <b>endometrioiden Tumoren</b>                       |                                                                           |
| <b>benigne</b>                                      |                                                                           |
| Zystadenom                                          | Endometriosezyste                                                         |
| Adenofibrom und Zystadenofibrom                     | endometrioides Zystadenom                                                 |
| Adenofibrom und Zystadenofibrom                     | endometrioides Zystadenofibrom                                            |
| <b>Borderline (EBOT)</b>                            |                                                                           |
| zystischer Tumor                                    | endometrioider EBOT/atypisch proliferierender endometrioider Tumor        |
| Adenofibrom und Zystadenofibrom                     |                                                                           |

geworden. Zystische seröse Tumoren mit > 10% BOT-Architektur werden als SBOT eingeordnet. Hat die Läsion einen kleineren BOT-Anteil als 10%, wird der Terminus „seröses Zystadenom mit fokaler epithelialer Proliferation“ verwendet. Die diagnostischen Kriterien des SBOT sind im Wesentlichen identisch geblieben. Betont wird das Fehlen von p53-Mutationen und die Abwesenheit einer diffusen p16-Färbung bei SBOTs. Die KRAS/BRAF-Mutationsfrequenz wird mit 50% angegeben. Die Progression eines SBOT zum LGSC wird mit 5% beziffert. Die mikropapilläre Variante des SBOT wird dezidiert erwähnt und umfassend beschrieben. Deren höheres Risiko für eine peritoneale Erkrankung (27 vs. 13% bei der konventionellen Variante) und die 50%ige Wahrscheinlichkeit, dass die peritonealen Herde bei einer mikropapillären SBOT-Variante einem serösen Low-Grade-Karzinom entspre-

Tab. 4 Fortsetzung

| bisher                                                 | neu (2014)                                                                  |
|--------------------------------------------------------|-----------------------------------------------------------------------------|
| <b>maligne</b>                                         |                                                                             |
| Adenokarzinom NOS                                      | endometrioides Karzinom                                                     |
| Adenokarzinofibrom (malignes Adenofibrom)              |                                                                             |
| maligner Müller-Mischtumor (Karzinom)                  |                                                                             |
| Adenosarkom                                            |                                                                             |
| endometrioides Stromasarkom (Low Grade)                |                                                                             |
| undifferenziertes ovariell Sarkom                      |                                                                             |
| <b>Klarzelltumoren</b>                                 |                                                                             |
| <b>benigne</b>                                         |                                                                             |
| Zystadenom                                             | Zystadenom                                                                  |
| Adenofibrom und Zystadenofibrom                        |                                                                             |
| Borderline (KBOT)                                      |                                                                             |
| zystischer Tumor                                       | KBOT/atypischer proliferierender Klarzelltumor                              |
| Adenofibrom und Zystadenofibrom                        |                                                                             |
| <b>maligne</b>                                         |                                                                             |
| Adenokarzinom                                          | Klarzellkarzinom                                                            |
| Adenokarzinofibrom (malignes Adenofibrom)              |                                                                             |
| <b>Transitionalzelltumoren</b>                         |                                                                             |
| <b>benigne</b>                                         |                                                                             |
| Brenner-Tumor                                          | Brenner-Tumor                                                               |
| metaplastische Variante                                |                                                                             |
| <b>Borderline</b>                                      |                                                                             |
| Borderline-Brenner-Tumor                               | Borderline-Brenner-Tumor/atypisch proliferierender Brennertumor             |
| proliferierende Variante                               |                                                                             |
| <b>maligne</b>                                         |                                                                             |
| Transitionalzellkarzinom                               |                                                                             |
| maligner Brenner-Tumor                                 | maligner Brenner-Tumor                                                      |
|                                                        | seromuzinöse Tumoren                                                        |
|                                                        | benigne                                                                     |
|                                                        | seromuzinöses Zystadenom                                                    |
|                                                        | seromuzinöses Adenofibrom                                                   |
|                                                        | Borderline                                                                  |
|                                                        | seromuzinöser Borderlinetumor/atypisch proliferierender seromuzinöser Tumor |
|                                                        | maligne                                                                     |
|                                                        | seromuzinöses Karzinom                                                      |
| <b>platteneitheliale Tumoren</b>                       |                                                                             |
| <b>gemischte epitheliale Tumoren</b>                   |                                                                             |
| <b>undifferenzierte und unklassifizierbare Tumoren</b> | <b>undifferenziertes Karzinom</b>                                           |

chen, werden betont. Mikropapilläre SBOTs haben die gleiche KRAS/BRAF-Mutationsfrequenz wie gewöhnliche SBOTs, aber das Genexpressionsprofil ist anders und ähnelt dem der serösen Low-Grade-Karzinome.

Bei SBOT mit invasiven Implantaten wird nun von einem serösen Low-Grade-Karzinom gesprochen. Dies ist allerdings eine ausschließlich auf pathologisch-morphologischen Kriterien beruhende Änderung der Klassifikation. Es gibt bisher keine klinischen Daten, die diesen Schritt notwendig erscheinen lassen. Daher ist zu fordern, dass in diesen Fällen vonseiten der Pathologie aus auch die alte Klassifikation angegeben wird, nach der sich die derzeitigen Empfehlungen zum klinischen Management ableiten.



Die Mikroinvasion eines SBOT wird nach wie vor metrisch begrenzt (5 mm Einzelherdausdehnung). Analog zur FIGO-Klassifikation wurde die kontinuierliche Graduierung des serösen Karzinoms in G1–G3 aufgegeben und durch die Unterteilung in Low-Grade- und High-Grade-Karzinome ersetzt. Bei Tumoren, die sich im morphologischen Grenzbereich zu den High-Grade-Karzinomen befinden, wird eine p53-Immunhistochemie empfohlen. Das Transitionalzellkarzinom des Ovars existiert in der neuen Klassifikation nicht mehr als eigene Entität. Das entsprechende histologische Wachstumsmuster wird aber, nunmehr als Variante des serösen oder (seltener) des endometrioiden Karzinoms (High Grade bzw. G3) beschrieben [22].

### Muzinöse Tumoren

Die Unterteilung der muzinösen Borderlinetumoren (MBOT) in einen intestinalen und einen endozervikalen Typ wurde aufgegeben. Die früheren endozervikalen MBOT finden sich nun in der neu geschaffenen seromuzinösen Tumorgruppe wieder, weswegen der jetzige MBOT der früheren intestinalen Variante entspricht. Bedeutsam ist der Hinweis, dass bei einem MBOT immer auch an die Möglichkeit des Vorliegens einer Metastase eines extragenitalen Malignoms gedacht werden muss. Bilateralität, kleine Tumoren und eine peritoneale Beherdung sind besonders metastasenverdächtig. Die Kategorie des MBOT mit intraepitheliales Karzinom wurde beibehalten, und auch die Termini des mikroinvasiven MBOT und des mikroinvasiven muzinösen Karzinoms werden genannt. Dennoch wurde die Definition der Invasion beim muzinösen Karzinom auch in der neuen Klassifikation noch nicht zufriedenstellend gelöst. Die Unterteilung der muzinösen Karzinome in einen expansilen und einen destruktiv-invasiven Typ wurde beibehalten [22].

### Seromuzinöse Tumoren

Diese Tumorgruppe ist die neue Entität der epithelialen Ovarialtumoren in der neuen WHO-Klassifikation. Im Wesentlichen umfasst diese Tumorgruppe die früheren muzinösen BOT vom endozervikalen Typ, wobei die WHO für die Diagnose das Vorhandensein von mindestens 2 Müller-Differenzierungsrichtungen verlangt. Die seromuzinösen BOTs ähneln in ihrer Architektur den SBOTs, sind aber zu einem Drittel mit Endometriosen assoziiert und stehen durch die ARID1A-Mutationen den endometrioiden Tumoren molekular näher als den serösen. Auch in dieser Kategorie gibt es mikroinvasive sowie mikropapilläre BOT und im Gegensatz zu den SBOTs auch BOTs mit intraepitheliales Karzinom. Da zu dieser Tumorgruppe noch keine umfangreichen Erfahrungen vorliegen, bleibt es abzuwarten, welche klinische Bedeutung sie erlangen wird [22, 23].

### Endometrioide Tumoren

Da ARID1A und PIK3CA-Mutationen sowie LOH von PTEN in Endometriosezysten und endometrioiden Zystadenomen in ähnlicher Häufigkeit vorkommen, kann ein pathogenetischer Zusammenhang postuliert werden. Auch beim endometrioiden Ovarialkarzinom finden sich gleichartige Mutationen. Endometriosen mit Atypien sind mit der Entwicklung von endometrioiden (und auch klarzelligen) Ovarialkarzinomen assoziiert [24, 25].

Die neue WHO-Klassifikation platziert die Endometriosezysten durch die gleiche Frequenz von ARID1A und PIK3CA-Mutationen sowie LOH von PTEN wie im endometrioiden Zystadenom in einen neoplastischen Kontext. Die endometrioide Borderlinekategorie wurde genauer aufgeschlüsselt. Unterschieden werden ein adenofibromatöser (vom endometrioiden Adenofibrom aus-

gehender) und ein intrazystischer (von einem endometrioiden Zystadenofibrom/von einer Endometriosezyste ausgehender) EBOT. Für EBOTs mit hochgradiger Kernatypie wird analog zu den MBOTs der diagnostische Terminus „mit intraepitheliales Karzinom“ empfohlen. Die Differenzialdiagnose zum Karzinom wurde, wiederum vergleichbar der Situation bei den muzinösen Tumoren, noch nicht zufriedenstellend gelöst. Das endometrioide Karzinom ist sehr variantenreich (squamöse Differenzierung, mit sekretorischen Veränderungen, mit muzinöser Differenzierung, oxyphile Variante oder mit Keimbahn-Stromatumor-ähnlichem Muster). Auch bei endometroid imponierenden Tumoren ist auch an die Möglichkeit einer Metastase zu denken [22].

### Klarzelltumoren

Bei den klarzelligen Tumoren hat die neue WHO keine wesentlichen Änderungen gebracht. Klarzellige BOTs sind den klarzelligen Adenomen sehr ähnlich und i. d. R. findet man auch beide Anteile innerhalb eines Tumors. Das klarzellige Karzinom ist demgegenüber von ungleichmäßiger Architektur, hat papilläre Strukturen und solide Anteile mit desmoplastischem sowie hyalinisiertem Stroma, und hochgradigen Kernatypien [22]. Das Klarzellkarzinom kann mit einem Lynch-Syndrom, aber auch einer Endometriose assoziiert sein und ist das häufigste Ovarialkarzinom mit paraneoplastischer Symptomatik (Thrombembolien oder Hyperkalzämie) [24, 25].

### Brenner-Tumoren

Das frühere Kapitel der transitionalzelligen Tumoren trägt nun die Überschrift „Brennertumoren“. Die zu ca. 25% mit anderen epithelialen Tumoren assoziierten Brenner-Tumoren bestehen aus variabel großen Zellnestern mit auch immunhistochemisch nachweisbarer transitionalzelliger Differenzierung. Die Grenzziehung zur Borderlinekategorie wird nicht präzise bzw. metrisch definiert. Der Brenner-BOT weist eine wesentlich stärkere Epithelproliferation auf, weswegen er zum einen deutlich größer ist (im Mittel 18 cm) und einen wesentlich höherer epithelialen Volumenanteil aufweist. Auch in dieser BOT-Kategorie gibt es nun ein „intraepitheliales Karzinom“. Der maligne Brenner-Tumor weist eine destruktive Stromainvasion auf, deren Morphologie aber nicht näher spezifiziert wird. Weiterhin haben diese Tumoren eine wenigstens fokale hochgradige Kernatypie [22].

### Institute

- <sup>1</sup> Gynäkologie und Geburtsmedizin, Uniklinik RWTH Aachen, Aachen
- <sup>2</sup> Gynäkologie, Universitätsmedizin Charité, Berlin
- <sup>3</sup> Gynäkologie und Gyn. Onkologie, Kliniken Essen-Mitte, Essen
- <sup>4</sup> Gynäkologie und Geburtshilfe, Universitätsmedizin Greifswald, Greifswald
- <sup>5</sup> Gynäkologie und Geburtshilfe, Technische Universität Dresden, Dresden
- <sup>6</sup> MVZ für Gynäkologie, Zytologie und Histologie Homburg (Saar), Homburg

### Literatur

- 1 Meinhold-Heerlein I, Hauptmann S. The heterogeneity of ovarian cancer. *Arch Gynecol Obstet* 2014; 289: 237–239
- 2 Prat J; FIGO Committee on Gynecologic Oncology. Staging classification for cancer of the ovary, fallopian tube, and peritoneum. *Int J Gynaecol Obstet* 2014; 124: 1–5
- 3 Shepherd JH. Revised FIGO staging for gynaecological cancer. *Br J Obstet Gynaecol* 1989; 96: 889–892
- 4 Pecorelli S, Benedet JL, Creasman WT et al. FIGO staging of gynecologic cancer. 1994–1997 FIGO Committee on Gynecologic Oncology. International Federation of Gynecology and Obstetrics. *Int J Gynaecol Obstet* 1999; 65: 243–249
- 5 Pecorelli S, Benedet JL, Creasman WT et al. FIGO staging of gynecologic cancer. 1994–1997 FIGO Committee on Gynecologic Oncology. International Federation of Gynecology and Obstetrics. *Int J Gynaecol Obstet* 1999; 64: 5–10

- 6 Przybycin CG, Kurman RJ, Ronnett BM et al. Are all pelvic (nonuterine) serous carcinomas of tubal origin? *Am J Surg Pathol* 2010; 34: 1407–1416
- 7 Zeppernick F, Meinhold-Heerlein I, Shih IeM. Precursors of ovarian cancer in the fallopian tube: serous tubal intraepithelial carcinoma—an update. *J Obstet Gynaecol Res* 2015; 41: 6–11
- 8 Benedet JL, Bender H, Jones H 3rd et al. FIGO staging classifications and clinical practice guidelines in the management of gynecologic cancers. FIGO Committee on Gynecologic Oncology. *Int J Gynaecol Obstet* 2000; 70: 209–262
- 9 Piek JM, van Diest PJ, Zweemer RP et al. Dysplastic changes in prophylactically removed Fallopian tubes of women predisposed to developing ovarian cancer. *J Pathol* 2001; 195: 451–456
- 10 Meinhold-Heerlein I, Bauerschlag D, Hilpert F et al. Molecular and prognostic distinction between serous ovarian carcinomas of varying grade and malignant potential. *Oncogene* 2005; 24: 1053–1065
- 11 Shih IeM, Kurman RJ. Ovarian tumorigenesis: a proposed model based on morphological and molecular genetic analysis. *Am J Pathol* 2004; 164: 1511–1518
- 12 Kurman RJ, Shih IeM. Molecular pathogenesis and extraovarian origin of epithelial ovarian cancer—shifting the paradigm. *Hum Pathol* 2011; 42: 918–931
- 13 Prat J. New insights into ovarian cancer pathology. *Ann Oncol* 2012; 23 (Suppl. 10): x111–x117
- 14 du Bois A, Reuss A, Pujade-Lauraine E et al. Role of surgical outcome as prognostic factor in advanced epithelial ovarian cancer: a combined exploratory analysis of 3 prospectively randomized phase 3 multicenter trials: by the Arbeitsgemeinschaft Gynaekologische Onkologie Studiengruppe Ovarialkarzinom (AGO-OVAR) and the Groupe d'Investigateurs Nationaux Pour les Etudes des Cancers de l'Ovaire (GINECO). *Cancer* 2009; 115: 1234–1244
- 15 Gershenson DM, Sun CC, Bodurka D et al. Recurrent low-grade serous ovarian carcinoma is relatively chemoresistant. *Gynecol Oncol* 2009; 114: 48–52
- 16 Gershenson DM, Sun CC, Iyer RB et al. Hormonal therapy for recurrent low-grade serous carcinoma of the ovary or peritoneum. *Gynecol Oncol* 2012; 125: 661–666
- 17 Hauptmann S, du Bois A, Meinhold-Heerlein I et al. [Histological grading of epithelial ovarian cancer. Review and recommendation]. *Der Pathologe* 2014; 35: 497–503
- 18 Hohn AK, Eienkel J, Wittekind C et al. [New FIGO classification of ovarian, fallopian tube and primary peritoneal cancer]. *Der Pathologe* 2014; 35: 322–326
- 19 Vergote I, De Brabanter J, Fyles A et al. Prognostic importance of degree of differentiation and cyst rupture in stage I invasive epithelial ovarian carcinoma. *Lancet* 2001; 357: 176–182
- 20 Paik ES, Lee YY, Lee EJ et al. Survival analysis of revised 2013 FIGO staging classification of epithelial ovarian cancer and comparison with previous FIGO staging classification. *Obstet Gynecol Sci* 2015; 58: 124–134
- 21 Suh DH, Kim TH, Kim JW et al. Improvements to the FIGO staging for ovarian cancer: reconsideration of lymphatic spread and intraoperative tumor rupture. *J Gynecol Oncol* 2013; 24: 352–358
- 22 Kurman RJ, Carcangiu ML, Herrington CS et al. WHO Classification of Tumours of female reproductive Organs. In: Kurman RJ, Carcangiu ML, Herrington CS et al., eds. WHO Classification of Tumours. 4th ed. Lyon: WHO Press; 2014
- 23 Hauptmann S. Die neue WHO-Klassifikation des Ovarial-, Tuben- und primären Peritonealkarzinoms. 2015
- 24 Chene G, Ouellet V, Rahimi K et al. The ARID1A pathway in ovarian clear cell and endometrioid carcinoma, contiguous endometriosis, and benign endometriosis. *Int J Gynaecol Obstet* 2015; 130: 27–30
- 25 Wiegand KC, Shah SP, Al-Agha OM et al. ARID1A mutations in endometriosis-associated ovarian carcinomas. *N Engl J Med* 2010; 363: 1532–1543
